# Supplementary material
Source: MDPI journal article supplement (https://www.mdpi.com/2306-5710/8/2/22)
Supplement: s1 [file s1]

# Optimizing the Quality and Commercial Value of Gyokuro-Styled Green Tea Grown in Australia

## Supplementary Materials

**Table S1.** The total concentration of target constituents (mean ± SD) of green tea plants grown under various ambient light intensities.

| Treatment        |                         | Target Constituents      |                          |                        |                          |                        |                        |
|------------------|-------------------------|--------------------------|--------------------------|------------------------|--------------------------|------------------------|------------------------|
| Light (%)        | Theanine (mg/g)         | Caffeine (mg/g)          | EC (mg/g)                | EGC (mg/g)             | EGCG (mg/g)              | GCG (mg/g)             | ECG (mg/g)             |
| 100 <sup>1</sup> | 51.4 ± 1.6 <sup>a</sup> | 45.1 ± 3.2 <sup>a</sup>  | 18.7 ± 2.1 <sup>ac</sup> | 5.5 ± 0.4 <sup>a</sup> | 56.2 ± 3.3 <sup>ab</sup> | 7.0 ± 1.5 <sup>a</sup> | 7.0 ± 8.0 <sup>a</sup> |
| 40               | 51.9 ± 2.5 <sup>a</sup> | 43.5 ± 1.7 <sup>a</sup>  | 18.6 ± 1.4 <sup>b</sup>  | 6.5 ± 0.3 <sup>a</sup> | 56.1 ± 1.7 <sup>ab</sup> | 8.3 ± 0.9 <sup>a</sup> | 6.5 ± 0.7 <sup>a</sup> |
| 16               | 53.7 ± 3.3 <sup>a</sup> | 42.4 ± 1.0 <sup>a</sup>  | 19.7 ± 3.2 <sup>c</sup>  | 4.9 ± 0.2 <sup>a</sup> | 58.4 ± 2.0 <sup>ab</sup> | 9.2 ± 0.7 <sup>a</sup> | 6.3 ± 1.0 <sup>a</sup> |
| 10               | 52.3 ± 2.9 <sup>a</sup> | 42.1 ± 0.8 <sup>ab</sup> | 19.4 ± 1.9 <sup>ab</sup> | 6.0 ± 0.2 <sup>a</sup> | 61.5 ± 2.4 <sup>a</sup>  | 6.9 ± 0.9 <sup>a</sup> | 5.9 ± 1.3 <sup>a</sup> |
| 1                | 61.5 ± 3.0 <sup>b</sup> | 38.8 ± 2.2 <sup>b</sup>  | 15.9 ± 3.1 <sup>ac</sup> | 5.4 ± 0.6 <sup>a</sup> | 53.1 ± 5.7 <sup>b</sup>  | 9.7 ± 3.6 <sup>a</sup> | 5.4 ± 1.3 <sup>a</sup> |

1 Indicates the control group. Values with shared superscripts within the same column indicate a non-significant difference in value (p >0.05).

**Table S2.** The total concentration of target constituents (mean ± SD) of green tea plants grown with and without red-colored wavelengths compared to full ambient light conditions.

| Treatment       |                         | Target Constituents     |                        |                         |                         |                         |                         |
|-----------------|-------------------------|-------------------------|------------------------|-------------------------|-------------------------|-------------------------|-------------------------|
| Shade Color     | Theanine (mg/g)         | Caffeine (mg/g)         | EC (mg/g)              | EGC (mg/g)              | EGCG (mg/g)             | GCG (mg/g)              | ECG (mg/g)              |
| NA <sup>1</sup> | 51.4 ± 1.6 <sup>a</sup> | 45.2 ± 3.2 <sup>a</sup> | 5.5 ± 0.4 <sup>a</sup> | 18.7 ± 2.1 <sup>a</sup> | 56.2 ± 3.3 <sup>a</sup> | 7.0 ± 1.5 <sup>a</sup>  | 7.0 ± 0.8 <sup>a</sup>  |
| Black           | 51.3 ± 3.3 <sup>a</sup> | 42.1 ± 0.8 <sup>a</sup> | 5.9 ± 0.2 <sup>a</sup> | 19.4 ± 1.9 <sup>a</sup> | 50.9 ± 3.8 <sup>a</sup> | 6.9 ± 0.9 <sup>a</sup>  | 5.9 ± 1.3 <sup>a</sup>  |
| Red             | 41.6 ± 4.0 <sup>b</sup> | 34.8 ± 4.6 <sup>b</sup> | 4.5 ± 1.0 <sup>b</sup> | 22.0 ± 4.3 <sup>a</sup> | 50.6 ± 4.6 <sup>a</sup> | 13.6 ± 5.1 <sup>b</sup> | 22.8 ± 2.4 <sup>b</sup> |

1 Indicates the control group. Values with shared superscripts within the same column indicate a non-significant difference in value (p >0.05).

**Table S3.** The total concentration of target constituents (mean  $\pm$  SD) of green tea plants grown in reduced light intensity (90% opacity) compared to full ambient sunlight conditions over 11 weeks

| Week           | Target Constituents         |                             |                             |                             |                             |                             |                            |                            |                             |                             |                            |                            |                            |                            |
|----------------|-----------------------------|-----------------------------|-----------------------------|-----------------------------|-----------------------------|-----------------------------|----------------------------|----------------------------|-----------------------------|-----------------------------|----------------------------|----------------------------|----------------------------|----------------------------|
|                | Theanine<br>(mg/g)          |                             | Caffeine<br>(mg/g)          |                             | EC<br>(mg/g)                |                             | EGC<br>(mg/g)              |                            | EGCG<br>(mg/g)              |                             | GCG<br>(mg/g)              |                            | ECG<br>(mg/g)              |                            |
|                | 100%                        | 10%                         | 100%                        | 10%                         | 100%                        | 10%                         | 100%                       | 10%                        | 100%                        | 10%                         | 100%                       | 10%                        | 100%                       | 10%                        |
| 0 <sup>1</sup> | 56.7 $\pm$ 2.2 <sup>a</sup> | 56.7 $\pm$ 2.2 <sup>a</sup> | 53.8 $\pm$ 2.0 <sup>a</sup> | 53.8 $\pm$ 2.0 <sup>a</sup> | 15.6 $\pm$ 0.2 <sup>a</sup> | 15.6 $\pm$ 0.2 <sup>a</sup> | 4.9 $\pm$ 0.7 <sup>a</sup> | 4.9 $\pm$ 0.7 <sup>a</sup> | 58.6 $\pm$ 3.9 <sup>a</sup> | 58.6 $\pm$ 3.9 <sup>a</sup> | 6.8 $\pm$ 0.8 <sup>a</sup> | 6.8 $\pm$ 0.8 <sup>a</sup> | 8.9 $\pm$ 1.2 <sup>a</sup> | 8.9 $\pm$ 1.2 <sup>a</sup> |
| 1              | 54.8 $\pm$ 2.0 <sup>a</sup> | 57.1 $\pm$ 0.9 <sup>a</sup> | 54.4 $\pm$ 2.6 <sup>a</sup> | 51.6 $\pm$ 3.8 <sup>a</sup> | 16.8 $\pm$ 0.7 <sup>a</sup> | 15.8 $\pm$ 0.7 <sup>a</sup> | 5.1 $\pm$ 1.2 <sup>a</sup> | 5.1 $\pm$ 1.1 <sup>a</sup> | 53.4 $\pm$ 5.5 <sup>a</sup> | 53.7 $\pm$ 5.4 <sup>a</sup> | 6.0 $\pm$ 0.5 <sup>a</sup> | 6.8 $\pm$ 0.8 <sup>a</sup> | 8.4 $\pm$ 1.3 <sup>a</sup> | 8.5 $\pm$ 1.4 <sup>a</sup> |
| 2              | 59.6 $\pm$ 2.7 <sup>a</sup> | 60.1 $\pm$ 1.6 <sup>a</sup> | 54.9 $\pm$ 3.0 <sup>a</sup> | 52.0 $\pm$ 4.5 <sup>a</sup> | 16.9 $\pm$ 0.6 <sup>a</sup> | 17.8 $\pm$ 1.2 <sup>a</sup> | 5.5 $\pm$ 0.6 <sup>a</sup> | 5.4 $\pm$ 1.3 <sup>a</sup> | 53.9 $\pm$ 3.0 <sup>a</sup> | 57.6 $\pm$ 2.9 <sup>a</sup> | 6.9 $\pm$ 1.0 <sup>a</sup> | 6.0 $\pm$ 0.5 <sup>a</sup> | 8.7 $\pm$ 0.8 <sup>a</sup> | 8.2 $\pm$ 1.1 <sup>a</sup> |
| 3              | 60.4 $\pm$ 1.4 <sup>a</sup> | 62.1 $\pm$ 2.7 <sup>a</sup> | 53.6 $\pm$ 2.5 <sup>a</sup> | 49.9 $\pm$ 1.5 <sup>a</sup> | 18.5 $\pm$ 1.3 <sup>a</sup> | 18.0 $\pm$ 1.4 <sup>a</sup> | 5.7 $\pm$ 1.0 <sup>a</sup> | 5.4 $\pm$ 1.0 <sup>a</sup> | 55.4 $\pm$ 6.8 <sup>a</sup> | 58.1 $\pm$ 1.6 <sup>a</sup> | 6.8 $\pm$ 1.0 <sup>a</sup> | 6.9 $\pm$ 1.1 <sup>a</sup> | 8.9 $\pm$ 1.6 <sup>a</sup> | 8.4 $\pm$ 0.9 <sup>a</sup> |
| 4              | 56.6 $\pm$ 2.7 <sup>a</sup> | 62.2 $\pm$ 1.0 <sup>b</sup> | 53.9 $\pm$ 2.7 <sup>a</sup> | 50.4 $\pm$ 4.0 <sup>a</sup> | 19.2 $\pm$ 3.0 <sup>a</sup> | 19.0 $\pm$ 1.6 <sup>a</sup> | 5.0 $\pm$ 1.3 <sup>a</sup> | 4.4 $\pm$ 0.4 <sup>a</sup> | 55.5 $\pm$ 4.9 <sup>a</sup> | 57.5 $\pm$ 2.1 <sup>a</sup> | 7.2 $\pm$ 0.9 <sup>a</sup> | 7.0 $\pm$ 1.1 <sup>a</sup> | 8.2 $\pm$ 1.0 <sup>a</sup> | 9.6 $\pm$ 0.7 <sup>a</sup> |
| 5              | 65.6 $\pm$ 1.0 <sup>a</sup> | 66.5 $\pm$ 0.7 <sup>a</sup> | 55.9 $\pm$ 2.8 <sup>a</sup> | 50.0 $\pm$ 1.2 <sup>b</sup> | 22.6 $\pm$ 1.0 <sup>a</sup> | 23.2 $\pm$ 2.1 <sup>a</sup> | 4.5 $\pm$ 0.4 <sup>a</sup> | 5.0 $\pm$ 1.1 <sup>a</sup> | 54.5 $\pm$ 4.6 <sup>a</sup> | 56.4 $\pm$ 5.0 <sup>a</sup> | 6.2 $\pm$ 0.4 <sup>a</sup> | 6.6 $\pm$ 0.3 <sup>a</sup> | 8.3 $\pm$ 1.1 <sup>a</sup> | 8.5 $\pm$ 0.9 <sup>a</sup> |
| 6              | 60.2 $\pm$ 4.1 <sup>a</sup> | 64.7 $\pm$ 2.8 <sup>a</sup> | 53.7 $\pm$ 2.5 <sup>a</sup> | 47.1 $\pm$ 1.2 <sup>b</sup> | 24.0 $\pm$ 1.9 <sup>a</sup> | 25.5 $\pm$ 2.2 <sup>a</sup> | 4.7 $\pm$ 0.9 <sup>a</sup> | 4.6 $\pm$ 1.5 <sup>a</sup> | 56.0 $\pm$ 3.5 <sup>a</sup> | 58.6 $\pm$ 4.6 <sup>a</sup> | 6.0 $\pm$ 0.7 <sup>a</sup> | 5.7 $\pm$ 0.3 <sup>a</sup> | 8.5 $\pm$ 1.5 <sup>a</sup> | 8.3 $\pm$ 1.4 <sup>a</sup> |
| 7              | 56.8 $\pm$ 3.0 <sup>a</sup> | 67.4 $\pm$ 0.6 <sup>b</sup> | 54.8 $\pm$ 1.9 <sup>a</sup> | 46.8 $\pm$ 3.7 <sup>b</sup> | 24.4 $\pm$ 2.6 <sup>a</sup> | 27.5 $\pm$ 2.4 <sup>a</sup> | 6.1 $\pm$ 1.0 <sup>a</sup> | 5.7 $\pm$ 0.5 <sup>a</sup> | 51.9 $\pm$ 2.1 <sup>a</sup> | 55.2 $\pm$ 5.7 <sup>a</sup> | 5.9 $\pm$ 0.4 <sup>a</sup> | 7.2 $\pm$ 0.9 <sup>a</sup> | 8.4 $\pm$ 1.4 <sup>a</sup> | 9.0 $\pm$ 1.0 <sup>a</sup> |
| 8              | 62.2 $\pm$ 3.5 <sup>a</sup> | 69.3 $\pm$ 2.2 <sup>b</sup> | 52.1 $\pm$ 1.6 <sup>a</sup> | 52.7 $\pm$ 1.3 <sup>a</sup> | 27.4 $\pm$ 3.3 <sup>a</sup> | 26.3 $\pm$ 2.8 <sup>a</sup> | 5.3 $\pm$ 1.2 <sup>a</sup> | 5.7 $\pm$ 0.8 <sup>a</sup> | 53.8 $\pm$ 3.5 <sup>a</sup> | 57.4 $\pm$ 5.2 <sup>a</sup> | 6.7 $\pm$ 0.9 <sup>a</sup> | 6.3 $\pm$ 0.6 <sup>a</sup> | 9.5 $\pm$ 0.8 <sup>a</sup> | 8.7 $\pm$ 1.5 <sup>a</sup> |
| 9              | 59.2 $\pm$ 6.1 <sup>a</sup> | 66.8 $\pm$ 0.3 <sup>b</sup> | 53.1 $\pm$ 1.7 <sup>a</sup> | 48.6 $\pm$ 5.0 <sup>a</sup> | 29.9 $\pm$ 1.8 <sup>a</sup> | 28.9 $\pm$ 2.5 <sup>a</sup> | 5.8 $\pm$ 0.9 <sup>a</sup> | 5.3 $\pm$ 1.3 <sup>a</sup> | 54.4 $\pm$ 4.6 <sup>a</sup> | 56.2 $\pm$ 5.6 <sup>a</sup> | 7.0 $\pm$ 0.6 <sup>a</sup> | 6.3 $\pm$ 0.9 <sup>a</sup> | 8.9 $\pm$ 1.1 <sup>a</sup> | 8.4 $\pm$ 1.1 <sup>a</sup> |
| 10             | 61.9 $\pm$ 3.2 <sup>a</sup> | 67.0 $\pm$ 0.3 <sup>b</sup> | 53.1 $\pm$ 1.4 <sup>a</sup> | 49.4 $\pm$ 3.5 <sup>a</sup> | 30.8 $\pm$ 1.4 <sup>a</sup> | 30.2 $\pm$ 0.7 <sup>a</sup> | 4.4 $\pm$ 1.2 <sup>a</sup> | 4.8 $\pm$ 0.8 <sup>a</sup> | 53.8 $\pm$ 4.0 <sup>a</sup> | 54.9 $\pm$ 2.1 <sup>a</sup> | 7.0 $\pm$ 1.0 <sup>a</sup> | 6.7 $\pm$ 0.8 <sup>a</sup> | 8.7 $\pm$ 1.1 <sup>a</sup> | 8.2 $\pm$ 1.5 <sup>a</sup> |
| 11             | 56.3 $\pm$ 2.5 <sup>a</sup> | 67.3 $\pm$ 0.6 <sup>b</sup> | 54.0 $\pm$ 1.0 <sup>a</sup> | 48.2 $\pm$ 6.3 <sup>a</sup> | 34.8 $\pm$ 0.7 <sup>a</sup> | 30.2 $\pm$ 1.5 <sup>a</sup> | 5.9 $\pm$ 1.4 <sup>a</sup> | 5.2 $\pm$ 1.3 <sup>b</sup> | 58.2 $\pm$ 3.4 <sup>a</sup> | 54.9 $\pm$ 2.8 <sup>a</sup> | 8.2 $\pm$ 0.2 <sup>a</sup> | 6.0 $\pm$ 0.5 <sup>b</sup> | 9.1 $\pm$ 1.0 <sup>a</sup> | 8.3 $\pm$ 1.4 <sup>a</sup> |

<sup>1</sup> Indicates the baseline. Values with shared superscripts indicate a non-significant difference in value ( $p > 0.05$ ) between the treatment and control groups, for each target constituent.
